# Supplementary material for: Performance of the Atherosclerotic Cardiovascular Disease Pooled Cohort Risk Equations by Social Deprivation Status
Source: PubMed Central journal article supplement — J Am Heart Assoc. 2017 Mar 17;6(3):e005676. doi: 10.1161/JAHA.117.005676 (PMC5524046; doi:10.1161/jaha.117.005676), 2017-03-17
Supplement: JAH3-6-e005676-s001.pdf [file JAH3-6-e005676-s001.pdf]

# **Supplemental Material**

**Table S1. Estimation of race- and sex-specific risk for atherosclerosis cardiovascular disease using the Pooled Cohort risk equations.<sup>1</sup>**

|                                                             | $S_0(t)$ at 5 years† | Mean score | Equations parameters*<br>Individual score‡                                                                                                                                                                                                                                                                                                   |
|-------------------------------------------------------------|----------------------|------------|----------------------------------------------------------------------------------------------------------------------------------------------------------------------------------------------------------------------------------------------------------------------------------------------------------------------------------------------|
| <i>Participants not taking antihypertensive medications</i> |                      |            |                                                                                                                                                                                                                                                                                                                                              |
| Black women                                                 | 0.98194              | 86.61      | $= 17.114 \times \ln(\text{age}) + 0.94 \times \ln(\text{TC}) - 18.92 \times \ln(\text{HDL-C}) + 4.475 \times \ln(\text{age}) \times \ln(\text{HDL-C}) + 27.82 \times \ln(\text{SBP}) - 6.087 \times \ln(\text{age}) \times \ln(\text{SBP})$ (+ 0.691 if current smoker)                                                                     |
| White women                                                 | 0.98898              | -29.18     | $= -29.799 \times \ln(\text{age}) + 4.884 \times \ln(\text{age})^2 + 13.54 \times \ln(\text{TC}) - 3.114 \times \ln(\text{age}) \times \ln(\text{TC}) - 13.578 \times \ln(\text{HDL-C}) + 3.149 \times \ln(\text{age}) \times \ln(\text{HDL-C}) + 1.957 \times \ln(\text{SBP})$ (+ 7.574 - 1.665 $\times \ln(\text{age})$ if current smoker) |
| Black men                                                   | 0.95726              | 19.54      | $= 2.469 \times \ln(\text{age}) + 0.302 \times \ln(\text{TC}) - 0.307 \times \ln(\text{HDL-C}) + 1.809 \times \ln(\text{SBP})$ (+ 0.549 if current smoker)                                                                                                                                                                                   |
| White men                                                   | 0.96254              | 61.18      | $= 12.344 \times \ln(\text{age}) + 11.853 \times \ln(\text{TC}) - 2.664 \times \ln(\text{age}) \times \ln(\text{TC}) - 7.99 \times \ln(\text{HDL-C}) + 1.769 \times \ln(\text{age}) \times \ln(\text{HDL-C}) + 1.764 \times \ln(\text{SBP})$ (+ 7.837 - 1.795 $\times \ln(\text{age})$ if current smoker)                                    |
| <i>Participants taking antihypertensive medications</i>     |                      |            |                                                                                                                                                                                                                                                                                                                                              |
| Black women                                                 | 0.98194              | 86.61      | $= 17.114 \times \ln(\text{age}) + 0.94 \times \ln(\text{TC}) - 18.92 \times \ln(\text{HDL-C}) + 4.475 \times \ln(\text{age}) \times \ln(\text{HDL-C}) + 29.291 \times \ln(\text{SBP}) - 6.432 \times \ln(\text{age}) \times \ln(\text{SBP})$ (+ 0.691 if current smoker)                                                                    |
| White women                                                 | 0.98898              | -29.18     | $= -29.799 \times \ln(\text{age}) + 4.884 \times \ln(\text{age})^2 + 13.54 \times \ln(\text{TC}) - 3.114 \times \ln(\text{age}) \times \ln(\text{TC}) - 13.578 \times \ln(\text{HDL-C}) + 3.149 \times \ln(\text{age}) \times \ln(\text{HDL-C}) + 2.019 \times \ln(\text{SBP})$ (+ 7.574 - 1.665 $\times \ln(\text{age})$ if current smoker) |
| Black men                                                   | 0.95726              | 19.54      | $= 2.469 \times \ln(\text{age}) + 0.302 \times \ln(\text{TC}) - 0.307 \times \ln(\text{HDL-C}) + 1.916 \times \ln(\text{SBP})$ (+ 0.549 if current smoker)                                                                                                                                                                                   |
| White men                                                   | 0.96254              | 61.18      | $= 12.344 \times \ln(\text{age}) + 11.853 \times \ln(\text{TC}) - 2.664 \times \ln(\text{age}) \times \ln(\text{TC}) - 7.99 \times \ln(\text{HDL-C}) + 1.769 \times \ln(\text{age}) \times \ln(\text{HDL-C}) + 1.797 \times \ln(\text{SBP})$ (+ 7.837 - 1.795 $\times \ln(\text{age})$ if current smoker)                                    |

\* Final risk estimation is calculated as:

$$\text{Predicted ASCVD risk} = 1 - S_0(t)^{(\text{Individual score} - \text{Mean score})}$$

† Obtained from the ACC/AHA Guideline on the Assessment of Cardiovascular Risk working group.<sup>2</sup>

‡ For clarity, coefficients for diabetes are not shown because REGARDS study participants with diabetes were excluded from the analysis.

ACC: American College of Cardiology; AHA: American Heart Association; HDL-C: high-density lipoprotein cholesterol; REGARDS: REasons for Geographic And Racial Differences in Stroke; SBP: systolic blood pressure; TC: total cholesterol.

**Table S2. Calibration of the atherosclerotic cardiovascular disease Pooled Cohort risk equations by the cumulative number of indicators showing deprivation.**

| Cumulative number of indicators showing deprivation* | 5-year incidence rate per 1,000 person-years by quintile of predicted risk |                    |                    |                     |                      | Hosmer-Lemeshow $\chi^2$ (p-value) |
|------------------------------------------------------|----------------------------------------------------------------------------|--------------------|--------------------|---------------------|----------------------|------------------------------------|
|                                                      | Quintile 1                                                                 | Quintile 2         | Quintile 3         | Quintile 4          | Quintile 5           |                                    |
| <i>0 (less deprivation)</i>                          |                                                                            |                    |                    |                     |                      |                                    |
| Observed (95% CI)†                                   | 0.84 (0.32, 2.24)                                                          | 2.30 (1.28, 4.14)  | 5.97 (4.14, 8.59)  | 7.23 (5.19, 10.04)  | 14.83 (11.81, 18.60) | 12.43 (0.01)                       |
| Predicted‡                                           | 0.98                                                                       | 3.05               | 6.02               | 10.22               | 19.80                |                                    |
| <i>1</i>                                             |                                                                            |                    |                    |                     |                      |                                    |
| Observed (95% CI)†                                   | 1.35 (0.44, 4.16)                                                          | 3.96 (2.07, 7.54)  | 4.77 (2.66, 8.54)  | 5.64 (3.29, 9.62)   | 17.35 (12.87, 23.29) | 6.60 (0.09)                        |
| Predicted‡                                           | 1.37                                                                       | 3.37               | 6.03               | 10.03               | 19.46                | -                                  |
| <b>2-3 (more deprivation)</b>                        |                                                                            |                    |                    |                     |                      |                                    |
| Observed (95% CI)†                                   | 4.29 (1.93, 9.44)                                                          | 5.66 (2.84, 11.19) | 7.74 (4.42, 13.44) | 13.84 (9.03, 21.08) | 25.97 (19.13, 35.01) | 5.77 (0.12)                        |
| Predicted‡                                           | 2.10                                                                       | 4.90               | 8.07               | 12.26               | 21.82                | -                                  |

\* The cumulative number of indicators showing deprivation is calculated by adding 1 for being in each of the following 3 categories: annual household income less than \$25,000 dollars; less than high school education, and living without a partner. Possible values for the cumulative number of indicators showing deprivation range from 0 to 3.

† Adjusted using the Kaplan-Meier method.

‡ Determined using the atherosclerotic cardiovascular disease Pooled Cohort risk equations.

The category with more deprivation is shown in **bold** in the table.

CI: confidence interval.

**Table S3. Calibration of the atherosclerotic cardiovascular disease Pooled Cohort risk equations by annual household income.**

| Annual household income (US\$)         | 5-year incidence rate per 1,000 person-years by quintile of predicted risk |                   |                    |                     |                      | Hosmer-Lemeshow $\chi^2$ (p-value) |
|----------------------------------------|----------------------------------------------------------------------------|-------------------|--------------------|---------------------|----------------------|------------------------------------|
|                                        | Quintile 1                                                                 | Quintile 2        | Quintile 3         | Quintile 4          | Quintile 5           |                                    |
| <b><i>≥\$50,000</i></b>                |                                                                            |                   |                    |                     |                      |                                    |
| Observed (95% CI)*                     | 0.85 (0.27, 2.61)                                                          | 2.48 (1.29, 4.74) | 4.42 (2.72, 7.17)  | 6.07 (4.02, 9.15)   | 11.93 (8.91, 15.92)  | 10.91 (0.01)                       |
| Predicted†                             | 0.84                                                                       | 2.46              | 5.04               | 8.75                | 17.48                | -                                  |
| <b><i>\$25,000 to &lt;\$50,000</i></b> |                                                                            |                   |                    |                     |                      |                                    |
| Observed (95% CI)*                     | 1.34 (0.50, 3.54)                                                          | 3.76 (2.09, 6.74) | 6.87 (4.46, 10.56) | 6.74 (4.37, 10.35)  | 18.79 (14.55, 24.20) | 8.09 (0.04)                        |
| Predicted†                             | 1.51                                                                       | 4.02              | 7.07               | 11.56               | 21.63                | -                                  |
| <b><i>&lt;\$25,000</i></b>             |                                                                            |                   |                    |                     |                      |                                    |
| Observed (95% CI)*                     | 3.89 (1.86, 8.09)                                                          | 4.87 (2.54, 9.27) | 8.07 (4.98, 13.03) | 12.37 (8.36, 18.20) | 24.58 (18.73, 32.09) | 4.74 (0.19)                        |
| Predicted†                             | 2.01                                                                       | 4.74              | 7.97               | 12.10               | 21.78                | -                                  |

\* Adjusted using the Kaplan-Meier method.

† Determined using the atherosclerotic cardiovascular disease Pooled Cohort risk equations.

The category used to define deprivation is shown in **bold** in the table.

CI: confidence interval; US\$: United States dollars.

**Table S4. Calibration of the atherosclerotic cardiovascular disease Pooled Cohort risk equations by education.**

| Education                         | 5-year incidence rate per 1,000 person-years by quintile of predicted risk |                    |                     |                     |                      | Hosmer-Lemeshow $\chi^2$ (p-value) |
|-----------------------------------|----------------------------------------------------------------------------|--------------------|---------------------|---------------------|----------------------|------------------------------------|
|                                   | Quintile 1                                                                 | Quintile 2         | Quintile 3          | Quintile 4          | Quintile 5           |                                    |
| <i>College graduate and above</i> |                                                                            |                    |                     |                     |                      |                                    |
| Observed (95% CI)*                | 0.85 (0.27, 2.62)                                                          | 3.04 (1.69, 5.46)  | 3.84 (2.28, 6.44)   | 8.12 (5.68, 11.58)  | 14.34 (10.99, 18.66) | 9.01 (0.03)                        |
| Predicted†                        | 0.96                                                                       | 2.88               | 5.71                | 9.75                | 19.40                | -                                  |
| <i>High school/Some college</i>   |                                                                            |                    |                     |                     |                      |                                    |
| Observed (95% CI)*                | 1.20 (0.50, 2.88)                                                          | 4.58 (2.93, 7.13)  | 6.12 (4.19, 8.94)   | 7.12 (5.03, 10.05)  | 16.96 (13.57, 21.14) | 8.62 (0.03)                        |
| Predicted†                        | 1.37                                                                       | 3.62               | 6.49                | 10.51               | 19.64                | -                                  |
| <i>Less than high school</i>      |                                                                            |                    |                     |                     |                      |                                    |
| Observed (95% CI)*                | 5.00 (1.62, 15.20)                                                         | 3.20 (0.81, 12.49) | 11.63 (5.59, 23.77) | 14.76 (7.78, 27.51) | 40.04 (27.43, 57.41) | 8.92 (0.03)                        |
| Predicted†                        | 2.67                                                                       | 6.23               | 10.08               | 14.71               | 25.71                | -                                  |

\* Adjusted using the Kaplan-Meier method.

† Determined using the atherosclerotic cardiovascular disease Pooled Cohort risk equations.

The category used to define deprivation is shown in **bold** in the table.

CI: confidence interval.

**Table S5. Calibration of the atherosclerotic cardiovascular disease Pooled Cohort risk equations by relationship status.**

| Relationship status             | 5-year incidence rate per 1,000 person-years by quintile of predicted risk |                   |                   |                    |                      | Hosmer-Lemeshow $\chi^2$ (p-value) |
|---------------------------------|----------------------------------------------------------------------------|-------------------|-------------------|--------------------|----------------------|------------------------------------|
|                                 | Quintile 1                                                                 | Quintile 2        | Quintile 3        | Quintile 4         | Quintile 5           |                                    |
| <i>Living with a partner</i>    |                                                                            |                   |                   |                    |                      |                                    |
| Observed (95% CI)*              | 1.08 (0.49, 2.40)                                                          | 2.53 (1.50, 4.25) | 6.57 (4.76, 9.05) | 7.39 (5.47, 9.97)  | 17.10 (14.08, 20.74) | 11.45 (0.01)                       |
| Predicted†                      | 1.08                                                                       | 3.32              | 6.42              | 10.77              | 20.52                | -                                  |
| <i>Living without a partner</i> |                                                                            |                   |                   |                    |                      |                                    |
| Observed (95% CI)*              | 1.39 (0.52, 3.68)                                                          | 5.84 (3.65, 9.32) | 4.71 (2.80, 7.90) | 7.82 (5.23, 11.66) | 19.48 (15.15, 24.96) | 7.49 (0.06)                        |
| Predicted†                      | 1.51                                                                       | 3.67              | 6.35              | 10.21              | 19.40                | -                                  |

\* Adjusted using the Kaplan-Meier method.

† Determined using the atherosclerotic cardiovascular disease Pooled Cohort risk equations.

The category used to define deprivation is shown in **bold** in the table.

CI: confidence interval.

**Table S6. Observed and predicted incidence rates of atherosclerotic cardiovascular disease and calibration and discrimination of the Pooled Cohort risk equations by social deprivation status (using multiple imputation with 12 imputed data sets, n = 10,768).**

|                                                            | Events /<br>Person-<br>years | Events in 5 years |            | 5-year incidence rate*     |              | Calibration                                                      |                                               | Discrimination              |
|------------------------------------------------------------|------------------------------|-------------------|------------|----------------------------|--------------|------------------------------------------------------------------|-----------------------------------------------|-----------------------------|
|                                                            |                              | Observed†         | Predicted‡ | Observed<br>(95% CI)†      | Predicted‡   | Hosmer-<br>Lemeshow $\chi^2$ ,<br>range across<br>12 imputations | p-value,<br>range across<br>12<br>imputations | C-index (95% CI)            |
| <i>Cumulative number of indicators showing deprivation</i> |                              |                   |            |                            |              |                                                                  |                                               |                             |
| 0 (less deprived)                                          | 252 / 39,078                 | 172               | 232        | 5.89 (4.97, 6.80)          | 7.94         | 17.77, 20.98                                                     | All <0.001                                    | 0.722 (0.690, 0.753)        |
| 1                                                          | 136 / 19,154                 | 96                | 119        | 6.57 (5.24, 7.96)          | 8.11         | 6.22, 10.88                                                      | 0.01, 0.10                                    | 0.728 (0.684, 0.772)        |
| <b>2-3 (more deprived)</b>                                 | <b>139 / 12,301</b>          | <b>112</b>        | <b>99</b>  | <b>11.18 (9.07, 13.56)</b> | <b>9.87</b>  | <b>4.64, 9.72</b>                                                | <b>0.02, 0.20</b>                             | <b>0.693 (0.647, 0.740)</b> |
| <i>Indicators of social deprivation status</i>             |                              |                   |            |                            |              |                                                                  |                                               |                             |
| <i>Annual household income (US\$)</i>                      |                              |                   |            |                            |              |                                                                  |                                               |                             |
| ≥\$50,000                                                  | 160 / 29,883                 | 109               | 155        | 4.88 (4.00, 5.80)          | 6.92         | 13.86, 19.06                                                     | <0.001, 0.003                                 | 0.724 (0.684, 0.765)        |
| \$25,000 to <\$50,000                                      | 190 / 24,470                 | 133               | 167        | 7.20 (6.02, 8.46)          | 9.06         | 8.82, 14.21                                                      | 0.003, 0.03                                   | 0.711 (0.673, 0.748)        |
| <b>&lt;\$25,000</b>                                        | <b>178 / 16,179</b>          | <b>137</b>        | <b>127</b> | <b>10.52 (8.59, 12.44)</b> | <b>9.76</b>  | <b>6.75, 11.68</b>                                               | <b>0.01, 0.08</b>                             | <b>0.702 (0.663, 0.742)</b> |
| <i>Education</i>                                           |                              |                   |            |                            |              |                                                                  |                                               |                             |
| College graduate and above                                 | 187 / 29,662                 | 128               | 168        | 5.90 (4.91, 6.93)          | 7.73         | 10.58, 11.98                                                     | 0.01, 0.01                                    | 0.725 (0.688, 0.763)        |
| High school/Some college                                   | 270 / 35,609                 | 194               | 230        | 7.00 (6.01, 8.01)          | 8.29         | 10.70, 12.75                                                     | 0.01, 0.01                                    | 0.706 (0.675, 0.737)        |
| <b>Less than high school</b>                               | <b>70 / 5,260</b>            | <b>57</b>         | <b>51</b>  | <b>13.11 (9.73, 16.88)</b> | <b>11.78</b> | <b>3.84, 10.72</b>                                               | <b>0.01, 0.28</b>                             | <b>0.728 (0.666, 0.790)</b> |
| <i>Relationship status</i>                                 |                              |                   |            |                            |              |                                                                  |                                               |                             |
| Living with a partner                                      | 328 / 46,128                 | 227               | 291        | 6.52 (5.67, 7.41)          | 8.37         | 17.86, 19.62                                                     | All <0.001                                    | 0.722 (0.695, 0.750)        |
| <b>Living without a partner</b>                            | <b>199 / 24,403</b>          | <b>150</b>        | <b>158</b> | <b>7.87 (6.60, 9.24)</b>   | <b>8.30</b>  | <b>2.90, 4.81</b>                                                | <b>0.19, 0.41</b>                             | <b>0.718 (0.681, 0.755)</b> |

\* Incidence rates are expressed per 1,000 person-years.

† Adjusted using the Kaplan-Meier method.

‡ Determined using the atherosclerotic cardiovascular disease Pooled Cohort risk equations.

Categories used to define deprivation within each indicator of social deprivation status are shown in **bold** in the table.

The median and maximum follow-up among participants included in the present analysis were 7.0 and 9.9 years, respectively.

For analyses in this table, we imputed 12 data sets using chained equations in Stata/I.C. version 12.1 (Stata Corporation, College Station, TX). We calculated the mean number of events, person-years of follow-up, observed and predicted number of events in 5 years, observed and predicted 5-year incidence rates, and C-index across the 12 imputed data sets. We calculated 95% confidence intervals for the observed 5-year incidence rate and C-index as described by White et al.<sup>3</sup>

For calibration, we report the range of Hosmer-Lemeshow  $\chi^2$  statistics and the corresponding p-value across the 12 imputed data sets.

CI: confidence interval; US\$: United States dollars.

**Table S7. Observed and predicted incidence rates of atherosclerotic cardiovascular disease and calibration and discrimination of the Pooled Cohort risk equations by area deprivation index.**

| Area deprivation index in participants' census tract† | Events / Person-years | Events in 5 years |            | 5-year incidence rate*   |             | Calibration              |             | Discrimination           |
|-------------------------------------------------------|-----------------------|-------------------|------------|--------------------------|-------------|--------------------------|-------------|--------------------------|
|                                                       |                       | Observed‡         | Predicted§ | Observed (95% CI)‡       | Predicted§  | Hosmer-Lemeshow $\chi^2$ | p-value     | C-index (95% CI)         |
| -47.0 to <96.7                                        | 87 / 13,794           | 62                | 79         | 6.08 (4.72, 7.81)        | 7.73        | 4.51                     | 0.21        | 0.74 (0.69, 0.80)        |
| 96.7 to <106.5                                        | 108 / 13,675          | 76                | 83         | 7.46 (5.95, 9.36)        | 8.15        | 8.68                     | 0.03        | 0.71 (0.66, 0.76)        |
| 106.5 to <112.8                                       | 106 / 13,572          | 77                | 88         | 7.49 (5.96, 9.41)        | 8.59        | 3.91                     | 0.27        | 0.75 (0.71, 0.79)        |
| <b>112.8 to 127.2</b>                                 | <b>106 / 12,945</b>   | <b>79</b>         | <b>93</b>  | <b>7.69 (6.11, 9.66)</b> | <b>9.08</b> | <b>4.91</b>              | <b>0.18</b> | <b>0.69 (0.64, 0.74)</b> |

\* Incidence rates are expressed per 1,000 person-years.

† Categories of area deprivation index were defined using quartiles of distribution.

‡ Adjusted using the Kaplan-Meier method.

§ Determined using the atherosclerotic cardiovascular disease Pooled Cohort risk equations.

The category with more deprivation is shown in **bold** in the table.

Data used to calculate the Hosmer-Lemeshow  $\chi^2$  are shown in **Table S7**.

The median and maximum follow-up among participants included in the present analysis were 7.0 and 9.9 years, respectively.

CI: confidence interval.



**Table S8. Calibration of the atherosclerotic cardiovascular disease Pooled Cohort risk equations by area deprivation index.**

| Area deprivation index in participants' census tract* | 5-year incidence rate per 1,000 person-years by quintile of predicted risk |                    |                    |                    |                      | Hosmer-Lemeshow $\chi^2$ (p-value) |
|-------------------------------------------------------|----------------------------------------------------------------------------|--------------------|--------------------|--------------------|----------------------|------------------------------------|
|                                                       | Quintile 1                                                                 | Quintile 2         | Quintile 3         | Quintile 4         | Quintile 5           |                                    |
| <i>-47.0 to &lt;96.7</i>                              |                                                                            |                    |                    |                    |                      |                                    |
| Observed (95% CI)†                                    | 1.06 (0.26, 4.19)                                                          | 2.54 (1.06, 6.05)  | 3.64 (1.74, 7.57)  | 7.08 (4.22, 11.81) | 16.15 (11.49, 22.58) | 4.51 (0.21)                        |
| Predicted‡                                            | 0.92                                                                       | 2.78               | 5.59               | 9.91               | 19.44                | -                                  |
| <i>96.7 to &lt;106.5</i>                              |                                                                            |                    |                    |                    |                      |                                    |
| Observed (95% CI)†                                    | 0.50 (0.07, 3.54)                                                          | 5.68 (3.16, 10.14) | 7.18 (4.28, 11.98) | 6.79 (3.97, 11.55) | 17.31 (12.45, 23.93) | 8.68 (0.03)                        |
| Predicted‡                                            | 1.18                                                                       | 3.16               | 6.15               | 10.28              | 19.96                | -                                  |
| <i>106.5 to &lt;112.8</i>                             |                                                                            |                    |                    |                    |                      |                                    |
| Observed (95% CI)†                                    | 1.07 (0.27, 4.26)                                                          | 1.59 (0.51, 4.91)  | 5.70 (3.17, 10.17) | 8.48 (5.24, 13.67) | 20.45 (15.14, 27.48) | 3.91 (0.27)                        |
| Predicted‡                                            | 1.34                                                                       | 3.69               | 6.58               | 10.77              | 20.57                | -                                  |
| <b>112.8 to 127.2</b>                                 |                                                                            |                    |                    |                    |                      |                                    |
| Observed (95% CI)†                                    | 2.82 (1.18, 6.72)                                                          | 4.34 (2.18, 8.59)  | 5.90 (3.29, 10.54) | 9.01 (5.65, 14.30) | 16.54 (11.70, 23.26) | 4.91 (0.18)                        |
| Predicted‡                                            | 1.70                                                                       | 4.47               | 7.44               | 11.28              | 20.49                | -                                  |

\* Categories of area deprivation index were defined using quartiles of distribution.

† Adjusted using the Kaplan-Meier method.

‡ Determined using the atherosclerotic cardiovascular disease Pooled Cohort risk equations.

The category with more deprivation is shown in **bold** in the table.

CI: confidence interval.

**Table S9. Hazard ratios for atherosclerosis cardiovascular disease associated with categories of area deprivation index.**

| <i>Area deprivation index in participants' census tract*</i> | Hazard ratio (95% CI)   |                         |                         |
|--------------------------------------------------------------|-------------------------|-------------------------|-------------------------|
|                                                              | Crude                   | Model 1                 | Model 2                 |
| -47.0 to <96.7                                               | 1 (reference)           | 1 (reference)           | 1 (reference)           |
| 96.7 to <106.5                                               | 1.25 (0.94-1.66)        | 1.28 (0.97-1.70)        | 1.17 (0.88-1.55)        |
| 106.5 to <112.8                                              | 1.24 (0.93-1.65)        | 1.27 (0.95-1.69)        | 1.08 (0.81-1.44)        |
| <b>112.8 to 127.2</b>                                        | <b>1.30 (0.98-1.73)</b> | <b>1.37 (1.01-1.84)</b> | <b>1.14 (0.85-1.55)</b> |

\* Categories of area deprivation index were defined using quartiles of distribution.

The category with more deprivation is shown in **bold** in the table.

CI: confidence interval; HDL-C: high-density lipoprotein cholesterol; SBP: systolic blood pressure.

Model 1 adjusts for age, sex and race.

Model 2 adjusts for age, sex and race, smoking status, total cholesterol, HDL-C, SBP and use of antihypertensive medications.

**Figure S1. Flow-chart of REGARDS study participants included in the analysis.**

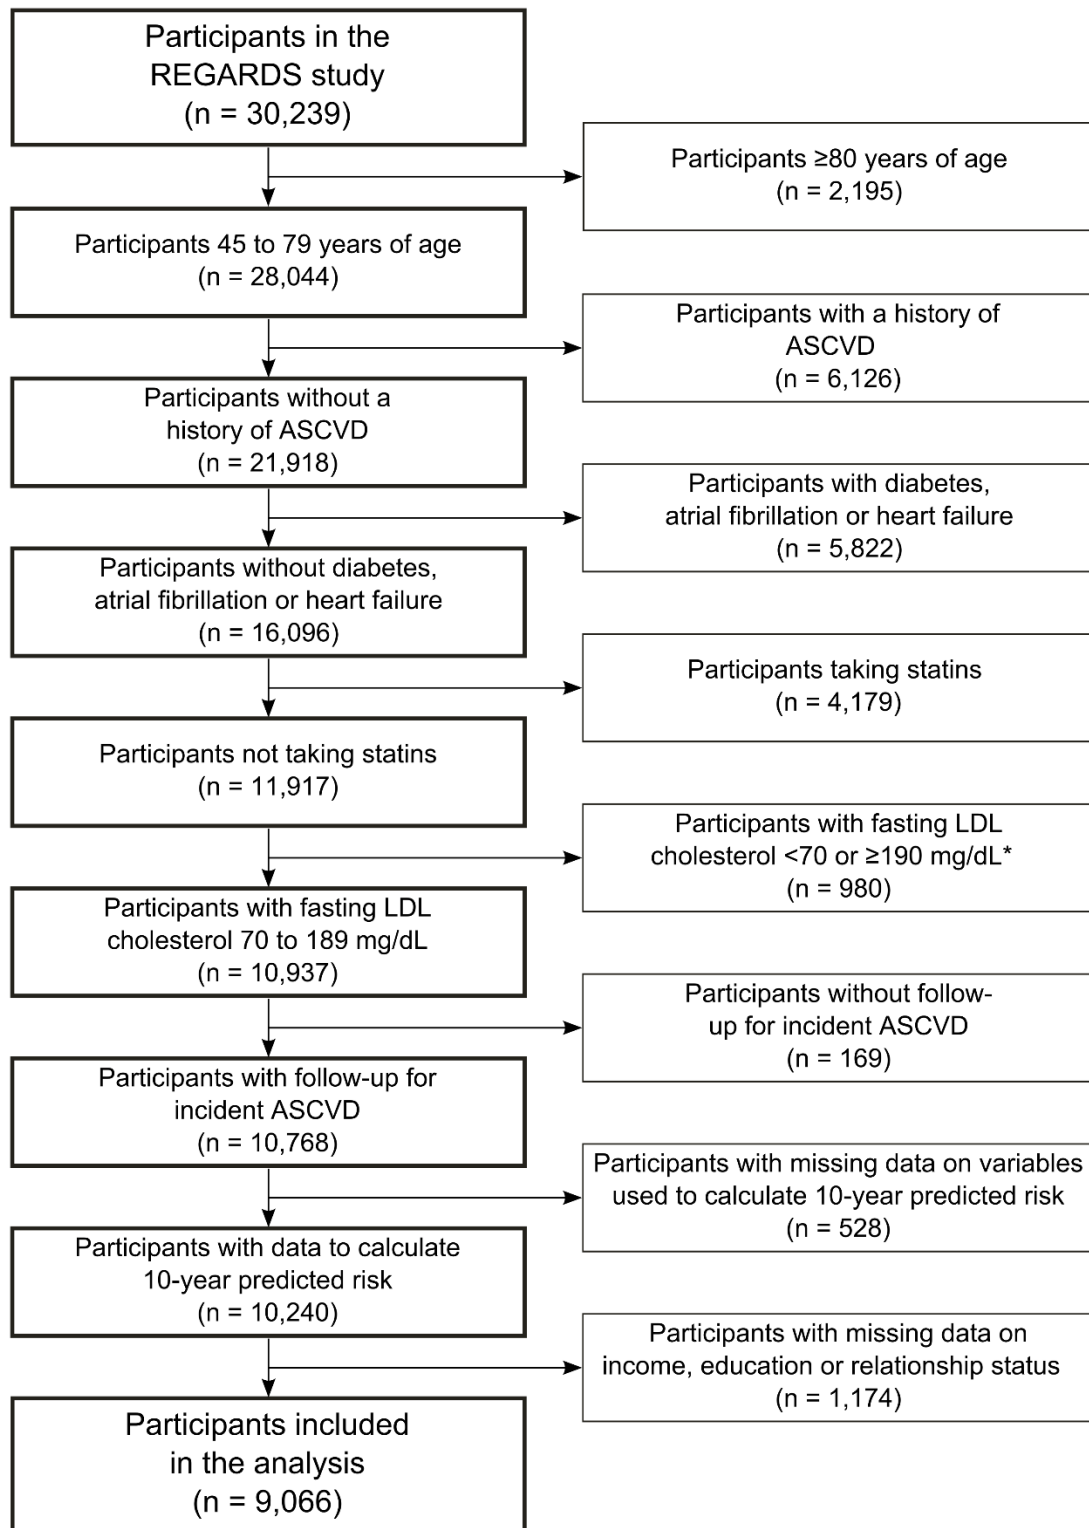

ASCVD: atherosclerotic cardiovascular disease; HDL-C: high-density lipoprotein cholesterol; LDL-C: low-density lipoprotein cholesterol; REGARDS: REasons for Geographic And Racial Differences in Stroke.

\* Or non-HDL-C <100 or ≥220 mg/dL if fasting LDL cholesterol was not available.

## Supplemental References:

1. Goff DC Jr, Lloyd-Jones DM, Bennett G, Coady S, D'Agostino RB, Gibbons R, Greenland P, Lackland DT, Levy D, O'Donnell CJ, Robinson JG, Schwartz JS, Shero ST, Smith SC Jr, Sorlie P, Stone NJ, Wilson PW, Jordan HS, Nevo L, Wnek J, Anderson JL, Halperin JL, Albert NM, Bozkurt B, Brindis RG, Curtis LH, DeMets D, Hochman JS, Kovacs RJ, Ohman EM, Pressler SJ, Sellke FW, Shen WK, Smith SC Jr, Tomaselli GF; American College of Cardiology/American Heart Association Task Force on Practice Guidelines. 2013 ACC/AHA guideline on the assessment of cardiovascular risk: a report of the American College of Cardiology/American Heart Association Task Force on Practice Guidelines. *Circulation*. 2014;129(25 Suppl 2):S49-73.
2. Muntner P, Colantonio LD, Cushman M, Goff DC Jr, Howard G, Howard VJ, Kissela B, Levitan EB, Lloyd-Jones DM, Safford MM. Validation of the atherosclerotic cardiovascular disease Pooled Cohort risk equations. *JAMA*. 2014;311:1406-15.
3. White IR, Royston P, Wood AM. Multiple imputation using chained equations: Issues and guidance for practice. *Stat Med*. 2011;30:377-99.
